# Supplementary material for: Long-term survival and clinical outcomes of non-vascularized autologous and allogeneic fibular grafts are comparable for treating osteonecrosis of the femoral head
Source: PubMed Central journal article supplement (PMC7863426; doi:10.1186/s13018-021-02246-3), 2021-02-04
Supplement: 13018_2021_2246_MOESM1_ESM.pdf [file 13018_2021_2246_MOESM1_ESM.pdf]

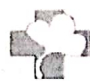

## 伦理审查意见

## Review Opinions

意见号 NO. K【2019】122

|                         |                                                                                                                                                                                                                                                                                                                                                                                                                                                                         |                                 |                                                           |
|-------------------------|-------------------------------------------------------------------------------------------------------------------------------------------------------------------------------------------------------------------------------------------------------------------------------------------------------------------------------------------------------------------------------------------------------------------------------------------------------------------------|---------------------------------|-----------------------------------------------------------|
| 项目名称<br>Protocol Title  | 髓心减压联合自体腓骨支撑或异体腓骨支撑治疗股骨头坏死：一项回顾性的中远期随访病例研究                                                                                                                                                                                                                                                                                                                                                                                                                              |                                 |                                                           |
| 试验目的<br>Objective       | <input type="checkbox"/> I 期临床试验； <input type="checkbox"/> II 期临床试验； <input type="checkbox"/> III 期临床试验； <input type="checkbox"/> IV 期临床试验；<br><input type="checkbox"/> 生物等效性试验； <input type="checkbox"/> 进口药注册临床试验； <input type="checkbox"/> 上市药再评价； <input type="checkbox"/> 中药保护品种试验；<br><input checked="" type="checkbox"/> 科研课题； <input type="checkbox"/> 医疗器械临床试用； <input type="checkbox"/> 医疗器械临床验证； <input type="checkbox"/> 研究生教育； <input type="checkbox"/> 其他 |                                 |                                                           |
| 审查类别<br>Review Category | <input checked="" type="checkbox"/> 初始审查<br><input type="checkbox"/> 跟踪审查（ <input type="checkbox"/> 修正案审查 <input type="checkbox"/> 年度/定期研究进展审查 <input type="checkbox"/> 违背方案审查<br><input type="checkbox"/> SAE 审查 <input type="checkbox"/> 暂停/终止研究审查 <input type="checkbox"/> 研究完成审查 <input type="checkbox"/> 其他_____）<br><input type="checkbox"/> 复审                                                                                                                   |                                 |                                                           |
| 科室/专业名称<br>Specialties  | 三骨科                                                                                                                                                                                                                                                                                                                                                                                                                                                                     | 主要研究者<br>Principal Investigator | 曾意荣 主任医师                                                  |
| 审查材料<br>documents       | 1、伦理审查申请；<br>2、临床研究方案（版本号 1.0）；<br>3、知情同意书（版本号 1.0）；<br>4、主要研究者专业履历；<br>5、主要研究者及研究团队利益冲突声明；<br>6、病例报告表（版本号 1.0）。                                                                                                                                                                                                                                                                                                                                                        |                                 | 申办单位<br>Sponsor<br>本院三骨科                                  |
| 审查方式<br>Review modes    | <input checked="" type="checkbox"/> 快速审查 Expedited<br><input type="checkbox"/> 会议审查 Full Board, 会议时间 Date: _____（另附会议签到副本）                                                                                                                                                                                                                                                                                                                                              |                                 |                                                           |
| 审查结论<br>Decision        | <input type="checkbox"/> 同意<br>approve<br><input checked="" type="checkbox"/> 作必要的修正后同意<br>Minor Revision.<br><input type="checkbox"/> 作必要的修正后重审<br>Major Revision<br><input type="checkbox"/> 不同意<br>Disapprove<br><input type="checkbox"/> 终止或暂停已批准的研究<br>Termination or Suspension<br><input type="checkbox"/> 转伦理会议审查<br>Transfer to Full Board Review                                                                                                              |                                 | 年度/定期跟踪审查频率<br>Annual Follow-Up Review Frequency<br>12 个月 |

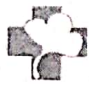

|                                                                          |                                                                                                                                                                                                                                                                                                                                                                                            |
|--------------------------------------------------------------------------|--------------------------------------------------------------------------------------------------------------------------------------------------------------------------------------------------------------------------------------------------------------------------------------------------------------------------------------------------------------------------------------------|
| <p>审查意见<br/>Opinions</p>                                                 | <p>根据卫计委《涉及人的生物医学研究伦理审查办法》（2016年）、SFDA《药物临床试验伦理审查工作指导原则》（2010年）、《医疗器械临床试验质量管理规范》（2016年），以及WMA《赫尔辛基宣言》和CIOMS《人体生物医学研究国际道德指南》的伦理原则，经本伦理委员会审查，修订意见如下：</p> <p>1、研究方案：收集“2004.1~2011.12”期间的患者病例数据，观察点不涉及门诊或复查，请明确如何获取患者知情同意？如无法获取，建议作知情同意例外的申请并提交保密协议。</p> <p>请于2个月内将复审申请表、伦理审查意见复印件、修改说明（请于院内网伦理专栏-资料下载-流程2下载模板）及修改后的文件（修改后的版本，需更新版本号/版本日期）、补充文件（如有）共一式2份报伦理委员会复审。若对审查意见有不同观点，请附加相关“说明报告”。</p> |
| <p>联系方式（委员/秘书）<br/>Contact/EC Secretary</p>                              | <p>黎老师，外线：020-36588667（周一、周三，14:30-17:30）/020-36591965；<br/>医院内线：1530（周一、周三，14:30-17:30）/1965；传真020-36591346；<br/>邮箱：gztcmliunli@163.com</p>                                                                                                                                                                                                                                               |
| <p>主任委员/被授权者签名<br/>Signature of the<br/>Chair/<br/>Authorized Person</p> | <p></p> <p></p> <p>日期： 2019-11-6</p>                                                                                                                                                                                  |

申明：本伦理委员会严格按照中国GCP及相关法规组成和工作。

广州中医药大学第一附属医院伦理委员会（盖章）
